# Supplementary material for: Insight into the dynamics of a long-runout mass movement using single-grain feldspar luminescence in the Pokhara Valley, Nepal
Source: Copernicus journal article supplement (doi:10.5194/gchron-6-53-2024), 2024-01-19
Supplement: Supplementary file 1 [file deboer_etal_doserate_data.xlsx]

## Sheet: Sheet1
Sample	Internal alpha [Gy/ka]	s.e.	Grain size + water attenuated [Gy/ka]	s.e.	External Gamma [Gy/ka]	s.e.	Cosmic [Gy/ka]	s.e.	Total external dose rate [Gy/ka]	s.e.	Extra feldspar: external alpha	s.e.	Extra feldspar: internal beta	s.e.	Total extra feldspar	s.e.	Total dose rate feldspar [Gy/ka]	s.e.	syst	random
NCL-7619109	0.01	0.005	1.514	0.091	1.018	0.0553	0.175	0.009	2.717	0.107	0.05	0.025	0.736	0.142	0.79	0.14	3.503	0.18	0.178	0.031
NCL-7619110	0.01	0.005	1.187	0.0706	0.917	0.0487	0.146	0.007	2.261	0.086	0.05	0.025	0.736	0.143	0.79	0.14	3.047	0.169	0.167	0.022
NCL-7619111	0.01	0.005	1.06	0.064	0.753	0.042	0.111	0.006	1.933	0.077	0.05	0.025	0.736	0.143	0.79	0.14	2.719	0.164	0.162	0.025
NCL-7619112	0.01	0.005	1.745	0.1047	1.175	0.064	0.025	0.001	2.955	0.122	0.05	0.025	0.736	0.143667	0.79	0.14	3.74	0.19	0.187	0.035
NCL-7619120	0.01	0.005	1.243	0.075	0.903	0.049	0.113	0.006	2.268	0.09	0.05	0.025	0.736	0.144167	0.79	0.14	3.054	0.171	0.168	0.028
NCL-7619121	0.01	0.005	1.112	0.067	0.842	0.047	0.113	0.006	2.076	0.082	0.05	0.025	0.736	0.144667	0.79	0.14	2.862	0.166	0.164	0.027
NCL-7619122	0.01	0.005	1.177	0.071	0.814	0.045	0.186	0.009	2.187	0.085	0.05	0.025	0.736	0.145167	0.79	0.14	2.973	0.168	0.166	0.027
NCL-7619123	0.01	0.005	1.531	0.092	1.138	0.062	0.208	0.01	2.887	0.111	0.05	0.025	0.736	0.145667	0.79	0.14	3.672	0.182	0.179	0.033
NCL-7619124	0.01	0.005	0.864	0.053	0.615	0.035	0.186	0.009	1.675	0.064	0.05	0.025	0.736	0.146167	0.79	0.14	2.461	0.158	0.157	0.022
NCL-7619125	0.01	0.005	1.503	0.089	1.161	0.061	0.186	0.009	2.86	0.109	0.05	0.025	0.736	0.146667	0.79	0.14	3.646	0.181	0.179	0.026
