# Supplementary material for: Insight into the dynamics of a long-runout mass movement using single-grain feldspar luminescence in the Pokhara Valley, Nepal
Source: Copernicus journal article supplement (doi:10.5194/gchron-6-53-2024), 2024-01-19
Supplement: Supplementary file 1 [file gchron-6-53-2024-supplement.zip]

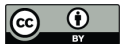

*Supplement of*

**Insight into the dynamics of a long-runout mass movement using single-grain feldspar luminescence in the Pokhara Valley, Nepal**

**Anna-Maartje de Boer et al.**

*Correspondence to:* Anna-Maartje de Boer ([anna-maartje.deboer@wur.nl](mailto:anna-maartje.deboer@wur.nl))

- [gchron-6-53-2024-supplement-title-page.pdf](#)
- [deboer\\_etal\\_supplemental\\_code\\_data\\_final](#)
  - [deboer\\_etal\\_Rcode.txt](#)
  - [deboer\\_etal\\_Rscript.R](#)
  - [deboer\\_etal\\_doserate\\_data.xlsx](#)
  - [deboer\\_etal\\_luminescence\\_data.xlsx](#)

The copyright of individual parts of the supplement might differ from the article licence.
